# Supplementary material for: Heparin-binding protein as a biomarker for the diagnosis of sepsis in the intensive care unit: a retrospective cross-sectional study in China
Source: HighWire-hosted journal article supplement (doi:10.1136/bmjopen-2023-078687), 2024-06-01
Supplement: bmjopen-2023-078687supp001_data_supplement.pdf [file bmjopen-2023-078687supp001_data_supplement.pdf]

1 **Supplementary Data**

2 Supplementary Table 1. The comparison of HBP among different sites.

|                                       | Infection           | Sepsis               | Septic shock           | <i>P</i> |
|---------------------------------------|---------------------|----------------------|------------------------|----------|
| Abdomen,<br>median (IQR)              | 24.8<br>(14.0–74.5) | 44.7<br>(25.9–108.0) | 78.0<br>(38.6–156.3.0) | <0.001   |
| Respiratory<br>median (IQR)           | 23.2<br>(10.8–55.3) | 55.2<br>(37.8–73.9)  | 55.7<br>(14.1–300)     | <0.001   |
| Blood<br>median (IQR)                 | 9.5*                | 80.4<br>(45.1–115.6) | 207.6<br>(176.6–238.6) | <0.001   |
| Skin and soft tissues<br>median (IQR) | 25.5<br>(19.1–37.3) | 27.3<br>(14.6–41.4)  | 61.8<br>(36.2–136)     | 0.027    |
| Other<br>median (IQR)                 | 18.3<br>(14.5–22.5) | 45.6<br>(27.0–64.3)  | 22.6<br>(19.5–86.7)    | 0.007    |
| Multi-infection site<br>median (IQR)  | 22.7<br>(20.9–32.8) | 37.7<br>(18.0–110.6) | 39.0<br>(23.7–134.6)   | 0.333    |

3

4 \* Only one patient with bloodstream infection in the infection group, IQR: interquartile range.

5

6 Supplementary Table 2. Univariate and multivariate logistic regression analysis of risk factors for  
7 sepsis diagnosis.

| Variable        | Univariate logistic regression<br>analysis |          | Multivariate logistic regression<br>analysis |          |
|-----------------|--------------------------------------------|----------|----------------------------------------------|----------|
|                 | OR (95%CI)                                 | <i>P</i> | OR (95%CI)                                   | <i>P</i> |
| Age             | 1.009 (0.993, 1.026)                       | 0.276    |                                              |          |
| Sex             | 1.169 (0.683, 1.999)                       | 0.569    |                                              |          |
| Hypertension    | 0.795 (0.450, 1.402)                       | 0.427    |                                              |          |
| Diabetes        | 0.801 (0.418, 1.538)                       | 0.505    |                                              |          |
| Cardiovascular  | 0.538 (0.288, 1.182)                       | 0.135    |                                              |          |
| Liver disease   | 1.572 (0.411, 6.014)                       | 0.509    |                                              |          |
| Malignant tumor | 1.471 (0.861, 2.514)                       | 0.158    |                                              |          |
| Other disease   | 0.998 (0.582, 1.712)                       | 0.994    |                                              |          |
| PCT             | 1.068 (1.037, 1.101)                       | <0.001   | 1.034 (1.009, 1.060)                         | 0.009    |
| CRP             | 1.014 (1.009, 1.018)                       | <0.001   | 1.011 (1.006, 1.016)                         | <0.001   |
| HBP             | 1.011 (1.006, 1.016)                       | <0.001   | 1.006 (1.000, 1.012)                         | 0.041    |
| IL-6            | 1.001 (1.000, 1.001)                       | <0.001   | 1.001 (1.000, 1.001)                         | 0.013    |
| LAC             | 1.198 (1.062, 1.352)                       | 0.003    |                                              |          |
| WBC             | 1.034 (0.992, 1.076)                       | 0.111    |                                              |          |
| APACHE II       | 1.108 (1.067, 1.152)                       | <0.001   |                                              |          |

SOFA 1.383 (1.276, 1.501) <0.001 1.252 (1.110, 1.412) <0.001

8 APACHE II: acute physiology and chronic health evaluation II, CRP: C-reactive protein, HBP:  
 9 heparin-binding protein, LAC: blood lactic acid, PCT: procalcitonin, IL-6: interleukin-6, SOFA:  
 10 sequential organ failure assessment, WBC: white blood cell count.

11

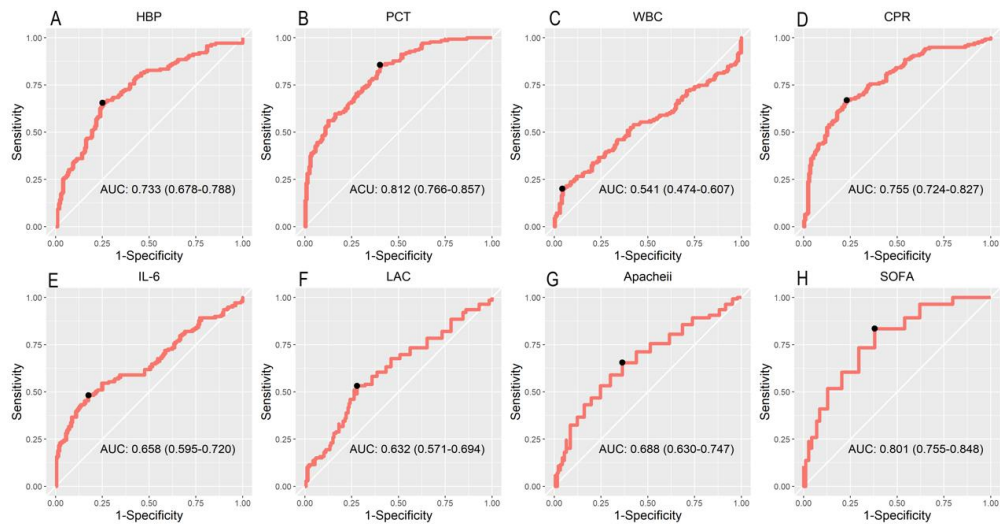

12

13 Supplementary Figure 1. ROC curves for biomarkers in distinguishing sepsis from non-sepsis. A:  
 14 HBP, B: PCT, C: WBC, D: CRP, E: IL-6, F: LAC, G: APACHE II, H: SOFA. APACHE II: acute  
 15 physiology and chronic health evaluation II, CRP: C-reactive protein, HBP: heparin-binding  
 16 protein, LAC: blood lactic acid, PCT: procalcitonin, IL-6: interleukin-6, SOFA: sequential organ  
 17 failure assessment, WBC: white blood cell count.

18

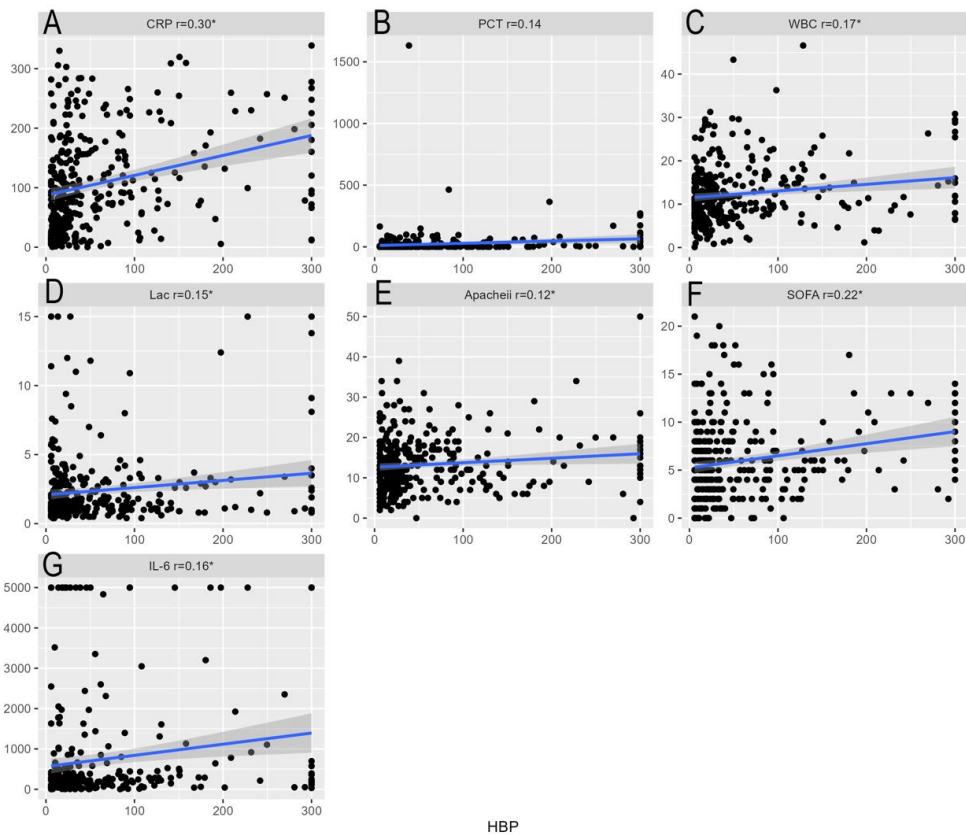

19

20 Supplementary Figure 2. The correlations of HBP with CRP (A), PCT (B), WBC (C), LAC (D),  
 21 APACHE II (E), SOFA (F), and IL-6(G). APACHE II: acute physiology and chronic health  
 22 evaluation II, CRP: C-reactive protein, LAC: blood lactic acid, PCT: procalcitonin, IL-6:  
 23 interleukin-6, SOFA: sequential organ failure assessment, WBC: white blood cell count.

24

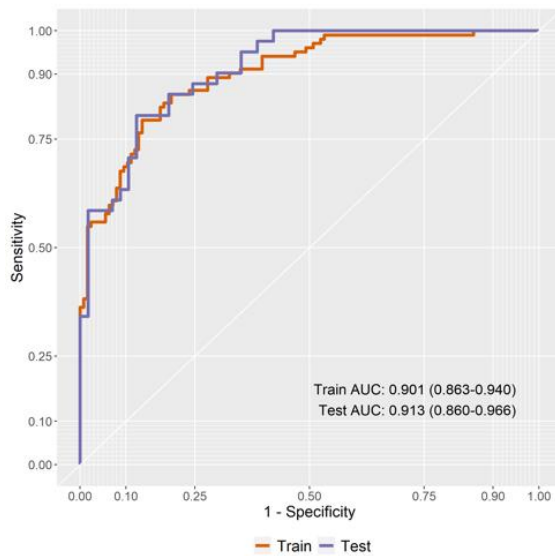

25

26 Supplementary Figure 3. ROC curve analysis of the sepsis training model and test model.

27

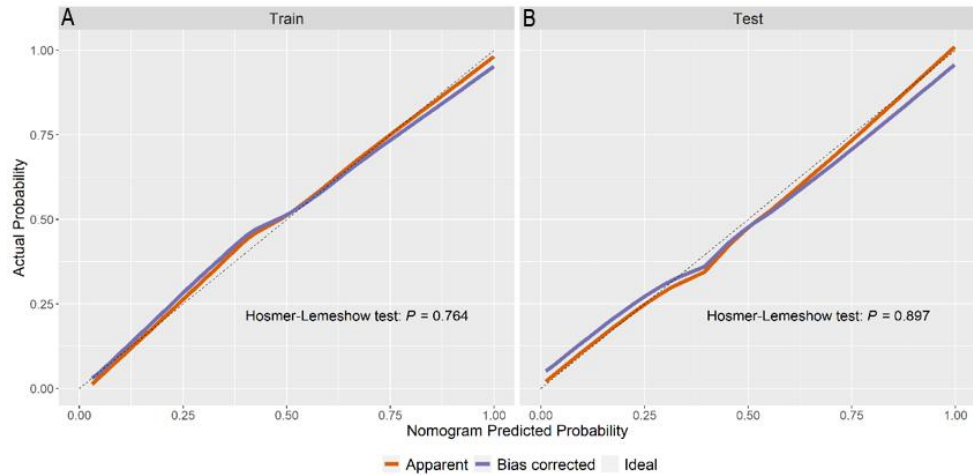

28

29 Supplementary Figure 4. Calibration test of the sepsis diagnostic model. A: training set, B: test set.

30

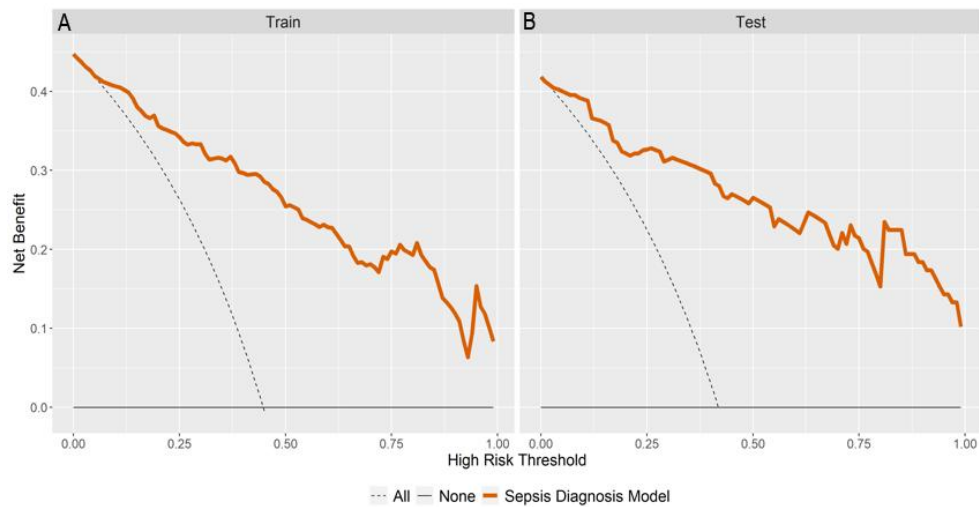

31

32 Supplementary Figure 5. Decision curve analysis (DCA) curve of the sepsis diagnostic model. A:

33 training set, B: test set. The black solid line is the net benefit of treating no patients, the black

34 dashed line is the net benefit of treating all patients, the orange solid line is the net benefit of

35 treating patients according to the sepsis diagnostic model. Throughout the entire threshold

36 range(x-axis), the sepsis diagnostic model surpasses both Treat-all and Treat-no.

37
